# Supplementary material for: Modeling daily mobility and trip purpose choices in activity budgets considering spatiotemporal constraints: A Case Study in the City of Seoul
Source: Research Square preprint supplement (doi:10.21203/rs.3.rs-7653816/v1), 2025-11-26
Supplement: Supplementary file 1 [file 13ac1f1544919302189531d1.docx]

**Declaration of interests**
 
☐ The authors declare that they have no known competing financial interests or personal relationships that could have appeared to influence the work reported in this paper.
 
☒ The authors declare the following financial interests/personal relationships which may be considered as potential competing interests:

| This research was supported by the Basic Science Research Program through the National Research Foundation of Korea (NRF), funded by the Ministry of Education (2022R1I1A1A01064168 and 2022R1A2C2012835). The authors are also grateful to Prof. Patricia L. Mokhtarian, who participated in the conceptualization, supervision, and writing, review, and editing. |
| --- |
