# Supplementary material for: Modeling daily mobility and trip purpose choices in activity budgets considering spatiotemporal constraints: A Case Study in the City of Seoul
Source: Research Square preprint supplement (doi:10.21203/rs.3.rs-7653816/v1), 2025-11-26
Supplement: Supplementary file 2 [file 361000a247731806f44b2761.docx]

Highlights

- Modeling Daily Mobility and Trip Purpose Choices in an Activity-based Framework
- Interpretations of Behavioral Choices on Activity Budgets considering Spatiotemporal Constraints, using National Household Travel Survey Data
- Comparing the Behavioral Differences Focused on the Travel Patterns using Econometric Behavioral Model
- Policy Implications for the Development of Sustainable Cities
